# Supplementary material for: Uncertainties in long-term ensemble estimates of contextual evapotranspiration over Southern France
Source: Copernicus journal article supplement (doi:10.5194/egusphere-2025-4522), 2025-10-20
Supplement: Supplementary file [file 2025-4522_RevisedSupplement_withTC.pdf › RC2/2025-4522_RevisedSupplement_withTC.pdf]

Supplementary information for ‘Uncertainties in long-term ensemble estimates of contextual evapotranspiration over Southern France’

Samuel Mwangi<sup>1,2\*</sup>, Albert Olioso<sup>1\*</sup>, Jordi Etchanchu<sup>3</sup>, Kanishka Mallick<sup>4,2</sup>, Aolin Jia<sup>4</sup>, Jérôme Demarty<sup>3</sup>, Nesrine Farhani<sup>3</sup>, Emmanuelle Sarrazin<sup>2</sup>, Philippe Gamet<sup>2</sup>, Jean-Louis Roujean<sup>2</sup>, Gilles Boulet<sup>2,5\*</sup>

<sup>1</sup>Unité de Recherche Ecologie des Forêts Méditerranéennes, INRAE, Avignon, France

<sup>2</sup>Université de Toulouse, CESBIO, CNES/CNRS/IRD/UPS/INRAE, Toulouse, France

<sup>3</sup>UMR HSM, IRD-CNRS-Université de Montpellier, Montpellier, France

<sup>4</sup>~~IAS, D-USYS, ETH Zürich, Switzerland~~~~Unit ENVISION, LIST, Belvaux, Luxembourg~~

<sup>5</sup>Indo-French Cell for Water Sciences (IFCWS), IISc, Bangalore, India

Formatted: English (United Kingdom)

Correspondence to: Samuel Mwangi (samuel.mwangi@inrae.fr); Albert Olioso (albert.olioso@inrae.fr)

1) Performance and similarity assessment of the EVASPA estimates (similar to section 4.2 but including VIIRS LST data)

Table S 1: Global performance of daily evapotranspiration based on the average of all EVASPA ensemble members (as in Table 2, but including VIIRS-based estimates).

|                                | Interpolated daily ET estimates |                     |                |               |                      |           |            | non-interpolated daily ET estimates |                     |                |               |                      |           |            |
|--------------------------------|---------------------------------|---------------------|----------------|---------------|----------------------|-----------|------------|-------------------------------------|---------------------|----------------|---------------|----------------------|-----------|------------|
|                                | RMSD<br>[mm/d]                  | Willmott's<br>D [-] | Bias<br>[mm/d] | MAE<br>[mm/d] | uncertainty (median) |           |            | RMSD<br>[mm/<br>d]                  | Willmott's<br>D [-] | Bias<br>[mm/d] | MAE<br>[mm/d] | uncertainty (median) |           |            |
|                                |                                 |                     |                |               | SD<br>[mm/d]         | CV<br>[-] | QCD<br>[-] |                                     |                     |                |               | SD<br>[mm/d]         | CV<br>[-] | QCD<br>[-] |
| Aurade                         | 0.93                            | 0.83                | 0.10           | 0.68          | 0.42                 | 0.30      | 0.21       | 1.18                                | 0.80                | 0.23           | 0.90          | 0.48                 | 0.25      | 0.18       |
| Bilos                          | 0.83                            | 0.86                | -0.17          | 0.62          | 0.43                 | 0.34      | 0.23       | 1.08                                | 0.81                | -0.09          | 0.82          | 0.52                 | 0.28      | 0.20       |
| Coussoul                       | 1.01                            | 0.63                | 0.62           | 0.72          | 0.47                 | 0.41      | 0.28       | 1.19                                | 0.57                | 0.77           | 0.93          | 0.56                 | 0.38      | 0.26       |
| Fontblanche                    | 0.94                            | 0.58                | -0.19          | 0.75          | 0.39                 | 0.41      | 0.27       | 1.06                                | 0.52                | -0.01          | 0.85          | 0.43                 | 0.36      | 0.24       |
| Lamasquere                     | 1.04                            | 0.71                | -0.41          | 0.70          | 0.40                 | 0.44      | 0.30       | 1.27                                | 0.62                | -0.37          | 0.88          | 0.49                 | 0.38      | 0.26       |
| LeBray                         | 0.74                            | 0.85                | -0.11          | 0.57          | 0.43                 | 0.36      | 0.25       | 0.88                                | 0.83                | 0.06           | 0.68          | 0.49                 | 0.30      | 0.21       |
| Puechabon                      | 0.87                            | 0.84                | 0.45           | 0.67          | 0.43                 | 0.26      | 0.18       | 1.09                                | 0.81                | 0.59           | 0.85          | 0.49                 | 0.23      | 0.16       |
| Toulouse                       | 1.10                            | 0.55                | -0.70          | 0.79          | 0.40                 | 0.68      | 0.47       | 1.35                                | 0.42                | -0.67          | 0.97          | 0.47                 | 0.64      | 0.44       |
| Croplands                      | 0.99                            | 0.78                | -0.16          | 0.69          | 0.41                 | 0.36      | 0.25       | 1.22                                | 0.74                | -0.07          | 0.89          | 0.49                 | 0.31      | 0.21       |
| Forests                        | 0.87                            | 0.80                | -0.02          | 0.67          | 0.42                 | 0.34      | 0.23       | 1.06                                | 0.76                | 0.18           | 0.83          | 0.48                 | 0.28      | 0.20       |
| Grasslands                     | 1.07                            | 0.50                | -0.27          | 0.78          | 0.43                 | 0.51      | 0.35       | 1.28                                | 0.40                | -0.13          | 0.96          | 0.52                 | 0.45      | 0.31       |
| Winter                         | 0.52                            | 0.54                | -0.14          | 0.38          | 0.16                 | 0.36      | 0.25       | 0.59                                | 0.49                | -0.07          | 0.47          | 0.18                 | 0.31      | 0.22       |
| Spring                         | 1.01                            | 0.71                | -0.22          | 0.78          | 0.54                 | 0.35      | 0.24       | 1.23                                | 0.64                | -0.11          | 0.95          | 0.59                 | 0.32      | 0.22       |
| Summer                         | 1.32                            | 0.59                | 0.06           | 1.05          | 0.73                 | 0.32      | 0.22       | 1.52                                | 0.57                | 0.21           | 1.22          | 0.74                 | 0.33      | 0.23       |
| Autumn                         | 0.70                            | 0.65                | -0.05          | 0.53          | 0.32                 | 0.35      | 0.24       | 0.83                                | 0.60                | 0.07           | 0.65          | 0.36                 | 0.32      | 0.22       |
| All sites and seasons combined | 0.94                            | 0.78                | -0.09          | 0.69          | 0.41                 | 0.35      | 0.24       | 1.15                                | 0.73                | 0.04           | 0.87          | 0.49                 | 0.32      | 0.22       |

Formatted Table

Formatted Table

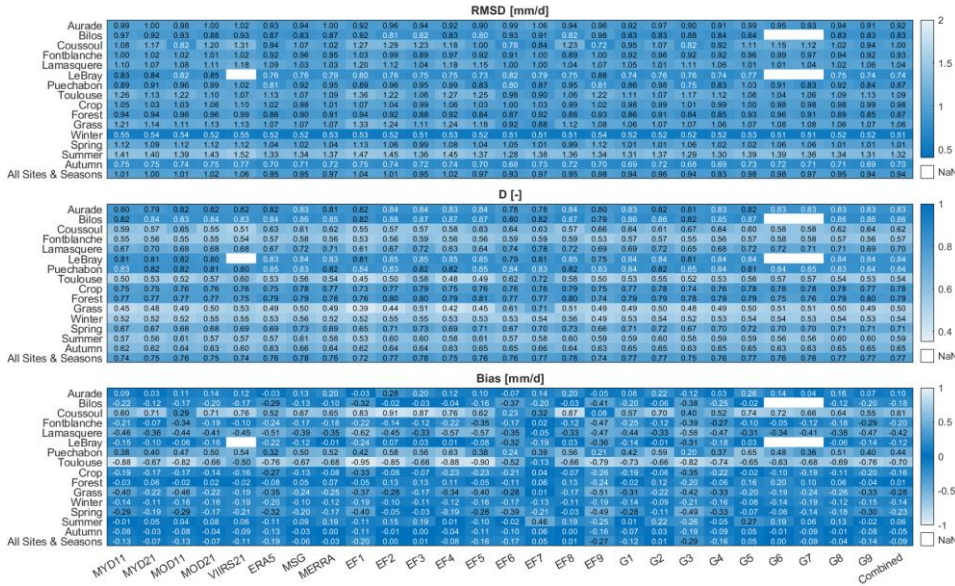

Figure S 1: As in Figure 5, but including VIIRS-based *set\** estimates.

*\* EVASPA model / set construction:*

- *LSTs example: the MYD11 set is constructed taking MYD11 LST/E as the unique LST dataset used together with the 3 radiation datasets, 9 EF and 9 G methods for 243 estimates.*
- *Radiation example: the ERA5 set is constructed taking ERA5 as the unique radiation dataset used together with the 4 LSTs (or 5 LSTs here, including VIIRS), 9 EF and 9 G methods for 324 (or 405 here, including VIIRS-based) ET estimates.*
- *EFs example: the EF1 set is constructed taking EF1 as the unique EF method used together with the 4 LSTs (or 5 LSTs here, including VIIRS), 3 radiation datasets, and 9 G methods for 108 (or 135 here, including VIIRS-based) estimates.*
- *G example: the G1 set is constructed taking G1 as the unique G flux method used together with the 4 LSTs (or 5 LSTs here, including VIIRS), 3 radiation datasets, and 9 EF methods for 108 (or 135 here, including VIIRS-based) estimates.*

Formatted: Font: (Default) Times New Roman, 10 pt, Italic

Formatted: Space After: 0 pt

Formatted: List Paragraph, Bulleted + Level: 1 + Aligned at: 0,63 cm + Indent at: 1,27 cm

Formatted: Font: Italic

Formatted: Font: (Default) Times New Roman, 10 pt, Italic

Formatted: Font: Italic

Formatted: Font: (Default) Times New Roman, 10 pt, Italic

Formatted: Font: Italic

Formatted: Font: (Default) Times New Roman, 10 pt, Italic

Formatted: Font: Italic

Formatted: Font: (Default) Times New Roman, 10 pt, Italic

Formatted: Font: Italic

Formatted: Font: (Default) Times New Roman, 10 pt, Italic

Formatted: Font: Italic

Formatted: Font: (Default) Times New Roman, 10 pt, Italic

Formatted: Font: Italic

Formatted: Font: (Default) Times New Roman, 10 pt, Italic

Formatted: Font: Italic

Formatted: Font: (Default) Times New Roman, 10 pt, Italic

Formatted: Font: Italic

Formatted: Font: (Default) Times New Roman, 10 pt, Italic

Formatted: Font: Italic

Formatted: Font: (Default) Times New Roman, 10 pt, Italic

Formatted: Font: Italic

Formatted: Font: (Default) Times New Roman, 10 pt, Italic

Formatted: Font: Italic

Formatted: Font: 10 pt, Not Bold, Italic

Formatted: Keep with next

Formatted Table

Formatted: Font: (Default) Times New Roman, Bold, Not Italic

Formatted: Caption

Formatted: Font: (Default) Times New Roman, Bold, Not Italic

Formatted: Font: (Default) Times New Roman, Bold

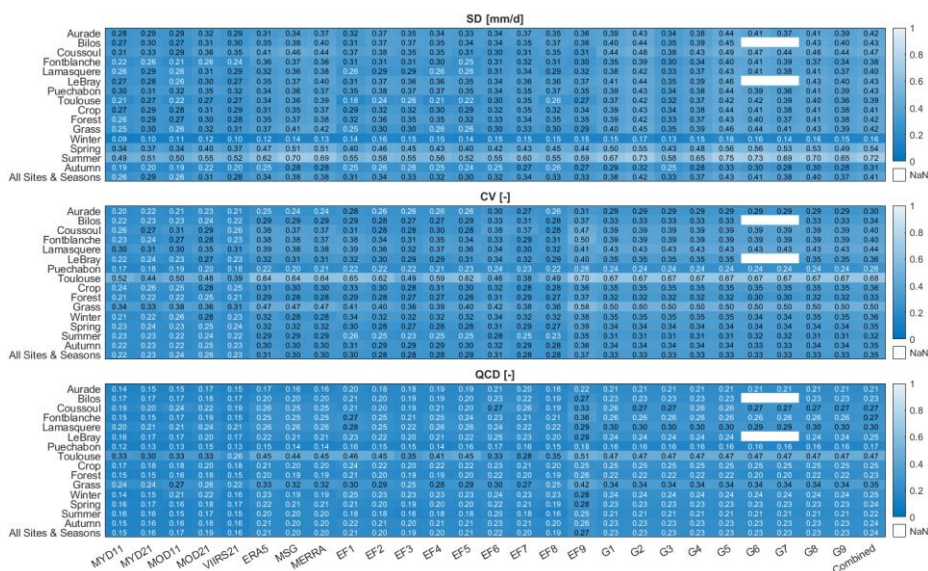

Figure S 2: As in Figure 6, but including VIIRS-based set\* estimates.

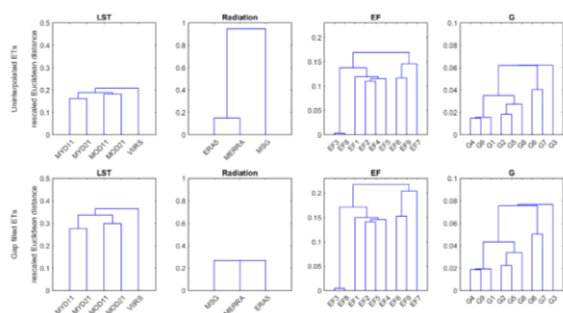

Figure S 32: As in Figure 78, but including VIIRS-based estimates.

### 2.1) Heatmaps between distinct/individual ensemble members

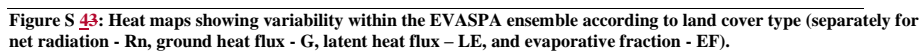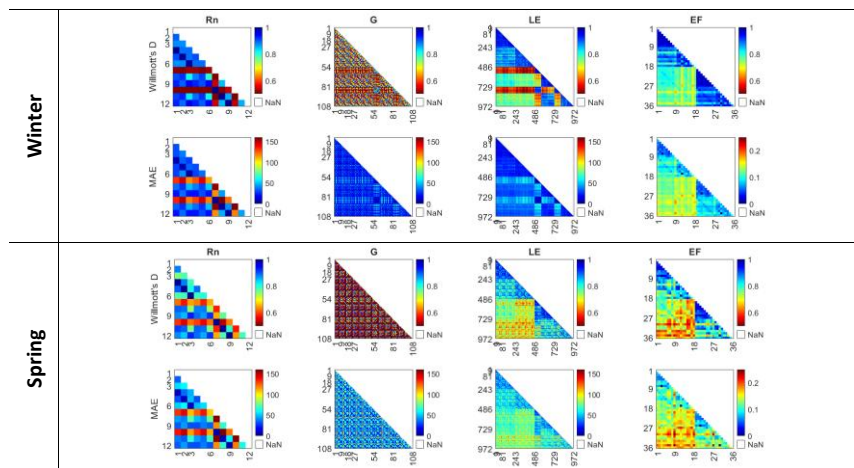

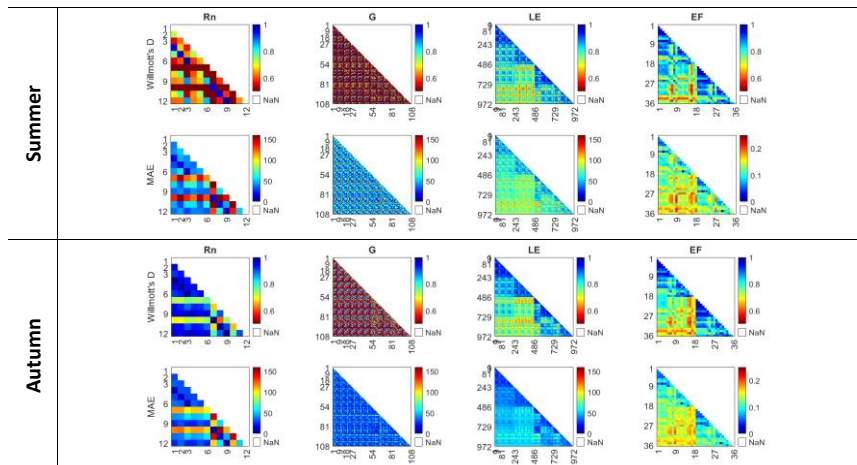

Figure S 54: Heat maps showing variability within the EVASPA ensemble per season (separately for Rn, G, LE and EF).

Formatted: Normal

## 2.2) Standard deviation bar graphs of the specific uncertainty introduced by selecting different member combinations of LST-Radiation-EF-G over the 2004-2024 simulation period: according to land cover types

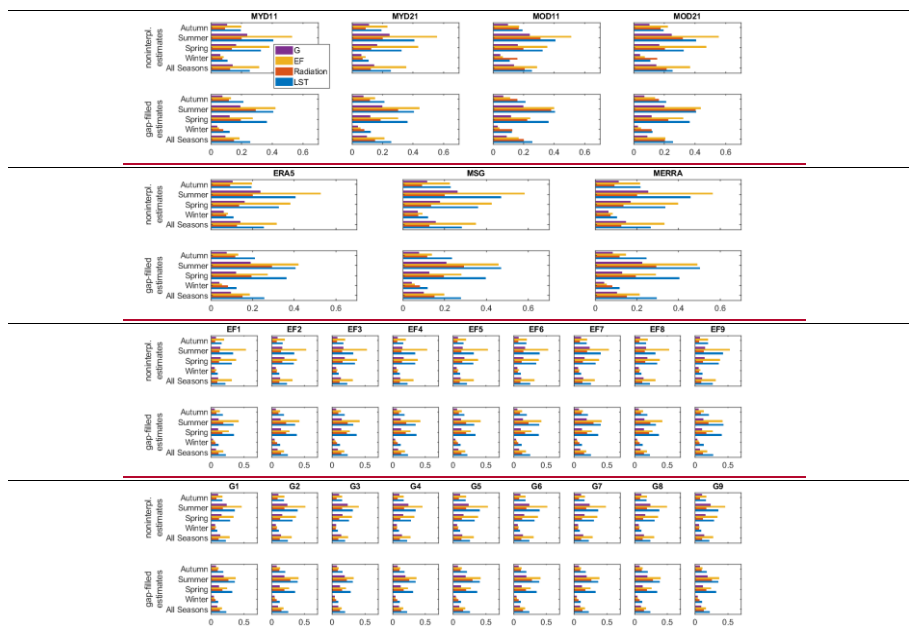

Figure S 6: As in Figure 12, but for Croplands – Auradé and Lamasquère.

Formatted: Font: (Default) Times New Roman, Bold, Not Italic, Font color: Auto

Formatted: Font: (Default) Times New Roman, Bold, Not Italic, Font color: Auto

Formatted: Font: Not Italic

Formatted: Caption

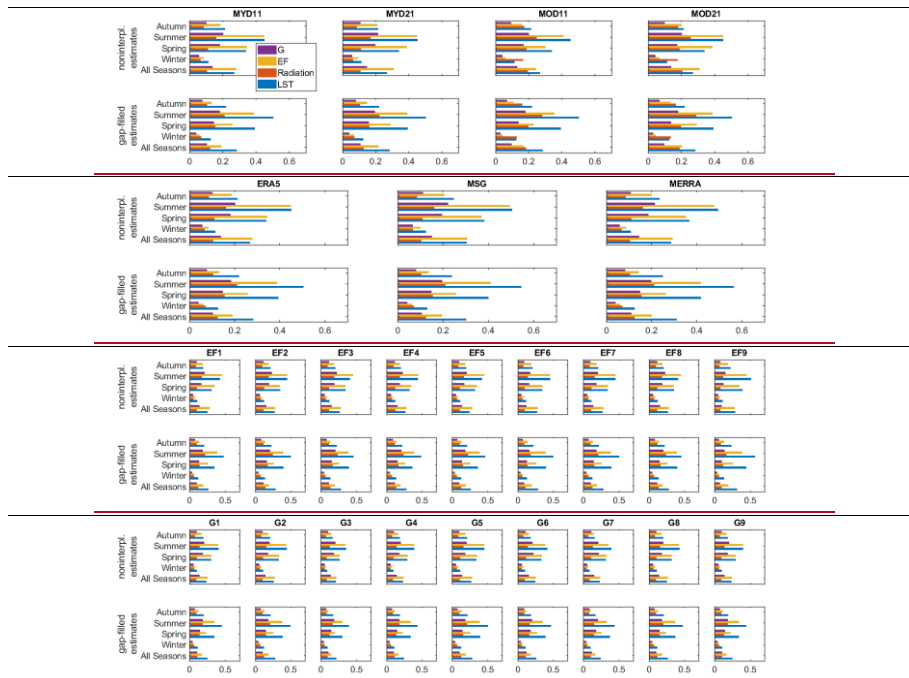

**Figure S.7:** As in Figure 12, but for Forests – Bilos, Le Bray, Fontblanche, Puechabon.

Formatted: Font: 9 pt



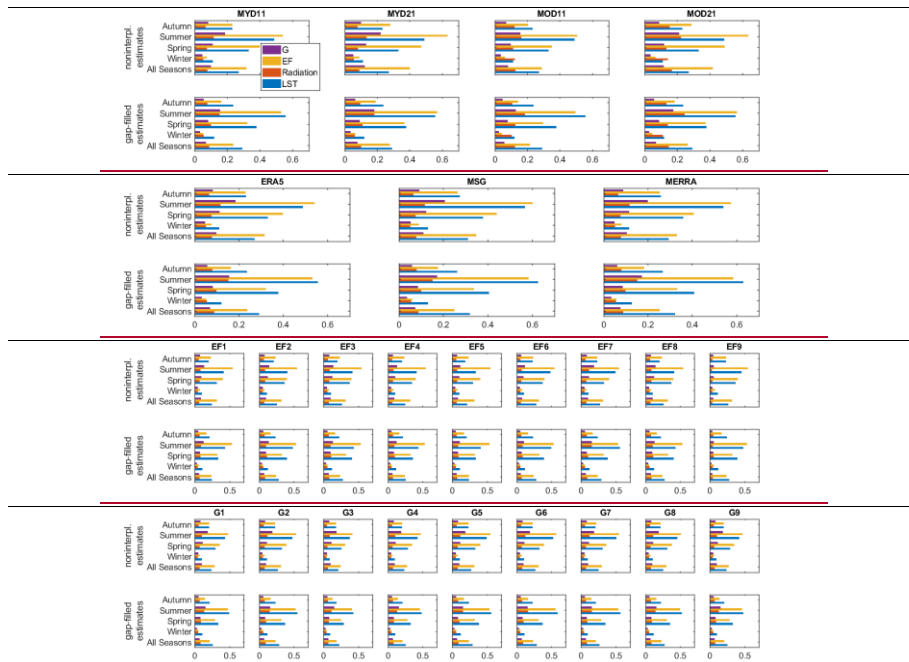

Figure S 8: As in Figure 12, but for Grasslands: Coussoul, Toulouse.

Formatted: Font: Not Italic, Font color: Auto

Formatted: Caption

Formatted: Font: Not Italic, Font color: Auto

Formatted: Font: (Default) Times New Roman, Bold
